# Supplementary material for: A longitudinal study of prediagnostic metabolic biomarkers and the risk of molecular subtypes of colorectal cancer
Source: PubMed Central journal article supplement (PMC7093429; doi:10.1038/s41598-020-62129-1), 2020-03-24
Supplement: 41598_2020_62129_MOESM1_ESM.pdf [file 41598_2020_62129_MOESM1_ESM.pdf]

## A longitudinal study of prediagnostic metabolic biomarkers and the risk of molecular subtypes of colorectal cancer

Myte et al.

### SUPPLEMENTARY MATERIAL

**Supplementary Table 1** Clinical characteristics in CRC cases by KRAS/BRAF mutation status.

| Variable                       | BRAF-mutated (n=156) | KRAS-mutated (n=167) | Both wild type (n=381) | Pa      | Missing, n (%) |
|--------------------------------|----------------------|----------------------|------------------------|---------|----------------|
| <b>Age at diagnosis, years</b> | 70.1 (65.5-70.1)     | 67.1 (58.1-67.1)     | 66.0 (60.1-66.0)       | <0.0001 | 0 (0)          |
| <b>Sex, women</b>              | 99 (63)              | 88 (53)              | 164 (43)               | <0.0001 | 0 (0)          |
| <b>Tumor site, n (%)</b>       |                      |                      |                        | <0.0001 | 8 (1)          |
| Right colon                    | 113 (72)             | 57 (34)              | 79 (21)                |         |                |
| Left colon                     | 25 (16)              | 48 (29)              | 127 (34)               |         |                |
| Rectum                         | 18 (12)              | 61 (37)              | 173 (46)               |         |                |
| <b>Tumor stage, n (%)</b>      |                      |                      |                        | 0.35    | 65 (6)         |
| Stage I&II                     | 73 (48)              | 88 (56)              | 194 (53)               |         |                |
| Stage III&IV                   | 79 (52)              | 69 (44)              | 170 (47)               |         |                |
| <b>MSI status, n (%)</b>       |                      |                      |                        | <0.0001 | 302 (30)       |
| MSI                            | 68 (50)              | 3 (2)                | 18 (5)                 |         |                |
| MSS                            | 68 (50)              | 137 (98)             | 324 (95)               |         |                |

MSS: Microsatellite stable.

a Linear regression-based test for age at diagnosis, chi-square tests for other variables.

**Supplementary Table 2** Odds ratios (95% CIs) of colorectal cancer (CRC) and CRC subtypes by metabolic biomarkers estimated in complete-case (CC) and multiple imputation (MI) analyses

| Exposure    | Outcome                    | Subtype         | n    | n <sub>CC</sub> | n <sub>cases</sub> | HR <sub>CC</sub> (95% CI) <sup>a</sup> | P <sub>heterogeneity</sub> <sub>CC</sub> | HR <sub>MI</sub> (95% CI) <sup>a</sup> | P <sub>heterogeneity</sub> <sub>MI</sub> |
|-------------|----------------------------|-----------------|------|-----------------|--------------------|----------------------------------------|------------------------------------------|----------------------------------------|------------------------------------------|
| Insulin     | CRC risk                   |                 | 2020 | 2020            | 1010               | 1.00 (0.89, 1.12)                      |                                          | 1.00 (0.89, 1.12)                      |                                          |
| C-peptide   | CRC risk                   |                 | 2020 | 2020            | 1010               | 1.07 (0.96, 1.19)                      |                                          | 1.07 (0.96, 1.19)                      |                                          |
| Adiponectin | CRC risk                   |                 | 2020 | 2020            | 1010               | 0.93 (0.84, 1.03)                      |                                          | 0.93 (0.84, 1.03)                      |                                          |
| Leptin      | CRC risk                   |                 | 2020 | 2020            | 1010               | 0.93 (0.82, 1.05)                      |                                          | 0.92 (0.82, 1.04)                      |                                          |
| Insulin     | CRC risk by follow-up time | <9 years        | 2020 | 2020            | 337                | 1.00 (0.84, 1.20)                      | 0.722                                    | 1.00 (0.84, 1.19)                      | 0.726                                    |
| Insulin     | CRC risk by follow-up time | 9 to <15 years  | 2020 | 2020            | 336                | 1.05 (0.88, 1.26)                      | 0.722                                    | 1.05 (0.88, 1.26)                      | 0.726                                    |
| Insulin     | CRC risk by follow-up time | 15 to <27 years | 2020 | 2020            | 337                | 0.95 (0.79, 1.14)                      | 0.722                                    | 0.95 (0.79, 1.14)                      | 0.726                                    |
| C-peptide   | CRC risk by follow-up time | <9 years        | 2020 | 2020            | 337                | 1.07 (0.88, 1.29)                      | 0.609                                    | 1.06 (0.87, 1.28)                      | 0.602                                    |
| C-peptide   | CRC risk by follow-up time | 9 to <15 years  | 2020 | 2020            | 336                | 1.14 (0.95, 1.38)                      | 0.609                                    | 1.15 (0.95, 1.38)                      | 0.602                                    |
| C-peptide   | CRC risk by follow-up time | 15 to <27 years | 2020 | 2020            | 337                | 1.02 (0.87, 1.19)                      | 0.609                                    | 1.02 (0.87, 1.19)                      | 0.602                                    |
| Adiponectin | CRC risk by follow-up time | <9 years        | 2020 | 2020            | 337                | 0.91 (0.77, 1.08)                      | 0.959                                    | 0.92 (0.78, 1.08)                      | 0.969                                    |
| Adiponectin | CRC risk by follow-up time | 9 to <15 years  | 2020 | 2020            | 336                | 0.94 (0.79, 1.11)                      | 0.959                                    | 0.93 (0.79, 1.11)                      | 0.969                                    |
| Adiponectin | CRC risk by follow-up time | 15 to <27 years | 2020 | 2020            | 337                | 0.95 (0.80, 1.12)                      | 0.959                                    | 0.95 (0.80, 1.12)                      | 0.969                                    |
| Leptin      | CRC risk by follow-up time | <9 years        | 2020 | 2020            | 337                | 0.86 (0.72, 1.02)                      | 0.325                                    | 0.85 (0.72, 1.01)                      | 0.316                                    |
| Leptin      | CRC risk by follow-up time | 9 to <15 years  | 2020 | 2020            | 336                | 1.02 (0.85, 1.22)                      | 0.325                                    | 1.01 (0.84, 1.21)                      | 0.316                                    |
| Leptin      | CRC risk by follow-up time | 15 to <27 years | 2020 | 2020            | 337                | 0.92 (0.77, 1.11)                      | 0.325                                    | 0.92 (0.76, 1.11)                      | 0.316                                    |
| Insulin     | CRC risk by tumor site     | Rectum          | 2020 | 2004            | 318                | 0.95 (0.79, 1.14)                      | 0.131                                    | 0.96 (0.80, 1.15)                      | 0.136                                    |
| Insulin     | CRC risk by tumor site     | Right colon     | 2020 | 2004            | 296                | 1.16 (0.96, 1.41)                      | 0.131                                    | 1.16 (0.96, 1.41)                      | 0.136                                    |

|             |                                           |                |      |      |     |                   |       |                   |       |
|-------------|-------------------------------------------|----------------|------|------|-----|-------------------|-------|-------------------|-------|
| Insulin     | CRC risk by tumor site                    | Left colon     | 2020 | 2004 | 388 | 0.91 (0.77, 1.09) | 0.131 | 0.91 (0.77, 1.09) | 0.136 |
| C-peptide   | CRC risk by tumor site                    | Rectum         | 2020 | 2004 | 318 | 1.09 (0.92, 1.29) | 0.842 | 1.09 (0.92, 1.29) | 0.855 |
| C-peptide   | CRC risk by tumor site                    | Right colon    | 2020 | 2004 | 296 | 1.03 (0.86, 1.22) | 0.842 | 1.03 (0.86, 1.22) | 0.855 |
| C-peptide   | CRC risk by tumor site                    | Left colon     | 2020 | 2004 | 388 | 1.09 (0.91, 1.31) | 0.842 | 1.09 (0.91, 1.31) | 0.855 |
| Adiponectin | CRC risk by tumor site                    | Rectum         | 2020 | 2004 | 318 | 1.00 (0.84, 1.18) | 0.571 | 1.00 (0.85, 1.18) | 0.565 |
| Adiponectin | CRC risk by tumor site                    | Right colon    | 2020 | 2004 | 296 | 0.88 (0.73, 1.06) | 0.571 | 0.88 (0.73, 1.06) | 0.565 |
| Adiponectin | CRC risk by tumor site                    | Left colon     | 2020 | 2004 | 388 | 0.91 (0.77, 1.07) | 0.571 | 0.91 (0.78, 1.07) | 0.565 |
| Leptin      | CRC risk by tumor site                    | Rectum         | 2020 | 2004 | 318 | 0.94 (0.79, 1.13) | 0.929 | 0.94 (0.78, 1.12) | 0.906 |
| Leptin      | CRC risk by tumor site                    | Right colon    | 2020 | 2004 | 296 | 0.94 (0.78, 1.14) | 0.929 | 0.94 (0.78, 1.13) | 0.906 |
| Leptin      | CRC risk by tumor site                    | Left colon     | 2020 | 2004 | 388 | 0.91 (0.76, 1.08) | 0.929 | 0.90 (0.76, 1.06) | 0.906 |
| Insulin     | CRC risk by KRAS and BRAF mutation status | BRAF-mutated   | 2020 | 1408 | 156 | 1.07 (0.84, 1.36) | 0.485 | 1.08 (0.86, 1.36) | 0.665 |
| Insulin     | CRC risk by KRAS and BRAF mutation status | KRAS-mutated   | 2020 | 1408 | 167 | 0.95 (0.75, 1.20) | 0.485 | 1.01 (0.81, 1.27) | 0.665 |
| Insulin     | CRC risk by KRAS and BRAF mutation status | Both wild type | 2020 | 1408 | 381 | 0.90 (0.75, 1.08) | 0.485 | 0.96 (0.82, 1.12) | 0.665 |
| C-peptide   | CRC risk by KRAS and BRAF mutation status | BRAF-mutated   | 2020 | 1408 | 156 | 1.14 (0.91, 1.44) | 0.394 | 1.15 (0.92, 1.44) | 0.628 |
| C-peptide   | CRC risk by KRAS and BRAF mutation status | KRAS-mutated   | 2020 | 1408 | 167 | 1.04 (0.81, 1.34) | 0.394 | 1.12 (0.88, 1.42) | 0.628 |
| C-peptide   | CRC risk by KRAS and BRAF mutation status | Both wild type | 2020 | 1408 | 381 | 0.95 (0.81, 1.13) | 0.394 | 1.02 (0.88, 1.18) | 0.628 |
| Adiponectin | CRC risk by KRAS and BRAF mutation status | BRAF-mutated   | 2020 | 1408 | 156 | 0.94 (0.74, 1.20) | 0.410 | 0.97 (0.78, 1.22) | 0.455 |
| Adiponectin | CRC risk by KRAS and BRAF mutation status | KRAS-mutated   | 2020 | 1408 | 167 | 0.83 (0.65, 1.05) | 0.410 | 0.81 (0.64, 1.03) | 0.455 |
| Adiponectin | CRC risk by KRAS and BRAF mutation status | Both wild type | 2020 | 1408 | 381 | 1.00 (0.86, 1.18) | 0.410 | 0.97 (0.84, 1.11) | 0.455 |
| Leptin      | CRC risk by KRAS and BRAF mutation status | BRAF-mutated   | 2020 | 1408 | 156 | 0.94 (0.75, 1.19) | 0.865 | 0.89 (0.71, 1.11) | 0.767 |
| Leptin      | CRC risk by KRAS and BRAF mutation status | KRAS-mutated   | 2020 | 1408 | 167 | 0.99 (0.77, 1.25) | 0.865 | 0.93 (0.74, 1.17) | 0.767 |
| Leptin      | CRC risk by KRAS and BRAF mutation status | Both wild type | 2020 | 1408 | 381 | 1.01 (0.85, 1.21) | 0.865 | 0.94 (0.81, 1.10) | 0.767 |
| Insulin     | CRC risk by MSI status                    | MSS            | 2020 | 1416 | 612 | 0.92 (0.79, 1.06) | 0.143 | 0.96 (0.85, 1.09) | 0.142 |

|             |                        |     |      |      |     |                   |       |                   |       |
|-------------|------------------------|-----|------|------|-----|-------------------|-------|-------------------|-------|
| Insulin     | CRC risk by MSI status | MSI | 2020 | 1416 | 96  | 1.19 (0.86, 1.64) | 0.143 | 1.22 (0.91, 1.63) | 0.142 |
| C-peptide   | CRC risk by MSI status | MSS | 2020 | 1416 | 612 | 1.04 (0.90, 1.19) | 0.421 | 1.04 (0.92, 1.17) | 0.279 |
| C-peptide   | CRC risk by MSI status | MSI | 2020 | 1416 | 96  | 1.19 (0.87, 1.65) | 0.421 | 1.23 (0.92, 1.62) | 0.279 |
| Adiponectin | CRC risk by MSI status | MSS | 2020 | 1416 | 612 | 0.98 (0.86, 1.11) | 0.414 | 0.95 (0.85, 1.06) | 0.343 |
| Adiponectin | CRC risk by MSI status | MSI | 2020 | 1416 | 96  | 0.84 (0.59, 1.18) | 0.414 | 0.81 (0.59, 1.10) | 0.343 |
| Leptin      | CRC risk by MSI status | MSS | 2020 | 1416 | 612 | 0.98 (0.84, 1.13) | 0.883 | 0.92 (0.81, 1.05) | 0.722 |
| Leptin      | CRC risk by MSI status | MSI | 2020 | 1416 | 96  | 0.96 (0.72, 1.28) | 0.883 | 0.93 (0.71, 1.23) | 0.722 |

a Hazard ratios (HRs) for CRC risk per 1 standard deviation (SD) increase in metabolic factors estimated with Cox regression, using age as a time scale, in complete case data and in the imputed data sets and aggregated using Rubin's rules.

**Supplementary Table 3** CRC case characteristics by KRAS and BRAF data availability. Median (interquartile range) or n (%).

| <b>Variable</b>                           | <b>KRAS, BRAF or MSI status data missing (n=387)</b> | <b>All data available (n=623)</b> | <b>P<sup>a</sup></b> |
|-------------------------------------------|------------------------------------------------------|-----------------------------------|----------------------|
| <b>Sex, female (%)</b>                    | 181 (47)                                             | 304 (49)                          | 0.57                 |
| <b>BMI, kg/m<sup>2</sup></b>              | 26.1 (19.0-43.6)                                     | 25.9 (17.4-46.7)                  | 0.26                 |
| <b>Systolic blood pressure, mmHg</b>      | 130.0 (95.0-221.0)                                   | 134.0 (90.0-235.0)                | 0.4                  |
| <b>Diastolic blood pressure, mmHg</b>     | 82.0 (55.0-119.0)                                    | 85.0 (50.0-130.0)                 | 0.26                 |
| <b>Glucose, mmol/l</b>                    | 5.4 (2.7-12.7)                                       | 5.4 (2.3-13.3)                    | 0.73                 |
| <b>Glucose tolerance, mmol/l</b>          | 6.5 (2.1-15.6)                                       | 6.7 (1.4-23.6)                    | 0.04                 |
| <b>Total cholesterol, mmol/l</b>          | 6.0 (3.0-10.2)                                       | 6.0 (2.8-10.9)                    | 0.62                 |
| <b>Triglycerides, mmol/l</b>              | 1.4 (0.4-6.1)                                        | 1.3 (0.4-15.2)                    | 0.41                 |
| <b>Insulin, ng/mL</b>                     | 0.2 (0.0-5.2)                                        | 0.2 (0.0-3.0)                     | 0.77                 |
| <b>C-peptide, ng/mL</b>                   | 1.3 (0.3-8.1)                                        | 1.3 (0.0-7.5)                     | 0.76                 |
| <b>Adiponectin, mg/L</b>                  | 19.0 (2.2-197.3)                                     | 19.7 (3.4-145.6)                  | 0.22                 |
| <b>Leptin, ng/mL</b>                      | 3.0 (0.1-52.5)                                       | 3.3 (0.1-142.5)                   | 0.57                 |
| <b>Smoking, n (%)</b>                     |                                                      |                                   | 0.04                 |
| Never smoker                              | 153 (40)                                             | 236 (39)                          |                      |
| Ex-smoker                                 | 122 (32)                                             | 237 (39)                          |                      |
| Current smoker                            | 107 (28)                                             | 135 (22)                          |                      |
| <b>Occupational PA, n (%)</b>             |                                                      |                                   | 0.42                 |
| 1 (sedentary or standing work)            | 74 (22)                                              | 128 (25)                          |                      |
| 2 (light but partly physically active)    | 70 (21)                                              | 108 (21)                          |                      |
| 3 (light and physically active)           | 75 (23)                                              | 109 (22)                          |                      |
| 4 (sometimes physically strenuous)        | 96 (29)                                              | 122 (24)                          |                      |
| 5 (physically strenuous most of the time) | 17 (5)                                               | 36 (7)                            |                      |
| <b>Recreational PA, n (%)</b>             |                                                      |                                   | 0.08                 |
| 1 (never)                                 | 141 (37)                                             | 279 (45)                          |                      |
| 2 (every now and then – not regularly)    | 95 (25)                                              | 151 (24)                          |                      |

|                                 |                  |                  |        |
|---------------------------------|------------------|------------------|--------|
| 3 (1-2 times/week)              | 88 (23)          | 109 (18)         |        |
| 4 (2-3 times/week)              | 37 (10)          | 51 (8)           |        |
| 5 (>3 times/week)               | 21 (5)           | 28 (5)           |        |
| <b>Age at diagnosis, years</b>  | 64.9 (39.5-83.9) | 67.3 (37.8-89.6) | 0.0002 |
| <b>Year of diagnosis, n (%)</b> |                  |                  | 0.1    |
| 1986-2006                       | 151 (39)         | 203 (33)         |        |
| 2007-2012                       | 142 (37)         | 244 (39)         |        |
| 2013-2016                       | 94 (24)          | 176 (28)         |        |
| <b>Tumor site, n (%)</b>        |                  |                  | 0.003  |
| Right colon                     | 97 (26)          | 221 (36)         |        |
| Left colon                      | 118 (31)         | 178 (29)         |        |
| Rectum                          | 165 (43)         | 223 (36)         |        |
| <b>Tumor stage, n (%)</b>       |                  |                  | 0.25   |
| Stage I&II                      | 168 (48)         | 310 (52)         |        |
| Stage III&IV                    | 182 (52)         | 285 (48)         |        |

---

a P-values from Wilcoxon's tests of equal distributions in continuous variables or chi-square tests of equal distributions in categorical variables.

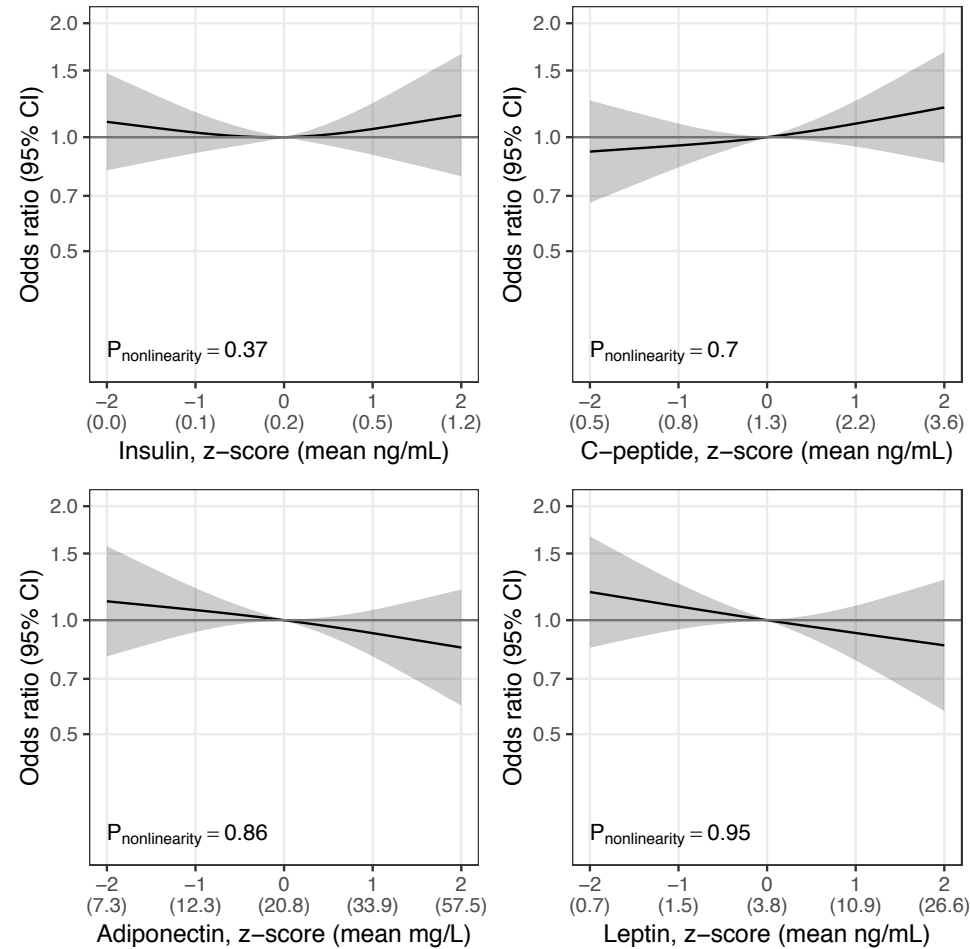

**Supplementary Figure 1. Relative risks (RRs) of CRC by levels of metabolic biomarkers.** Based on estimates from conditional logistic regression models, with biomarkers modeled with restricted cubic splines with knots at the 5<sup>th</sup>, 50<sup>th</sup> and 95<sup>th</sup> percentiles. Estimates were adjusted for matching variables and smoking, recreational and occupational physical activity, alcohol intake, and BMI. Values in parenthesis indicate mean non-transformed levels among participants with a z-score  $\pm 0.2$  around the corresponding score. Nonlinearity was tested with a likelihood ratio test comparing the spline model to a linear model.

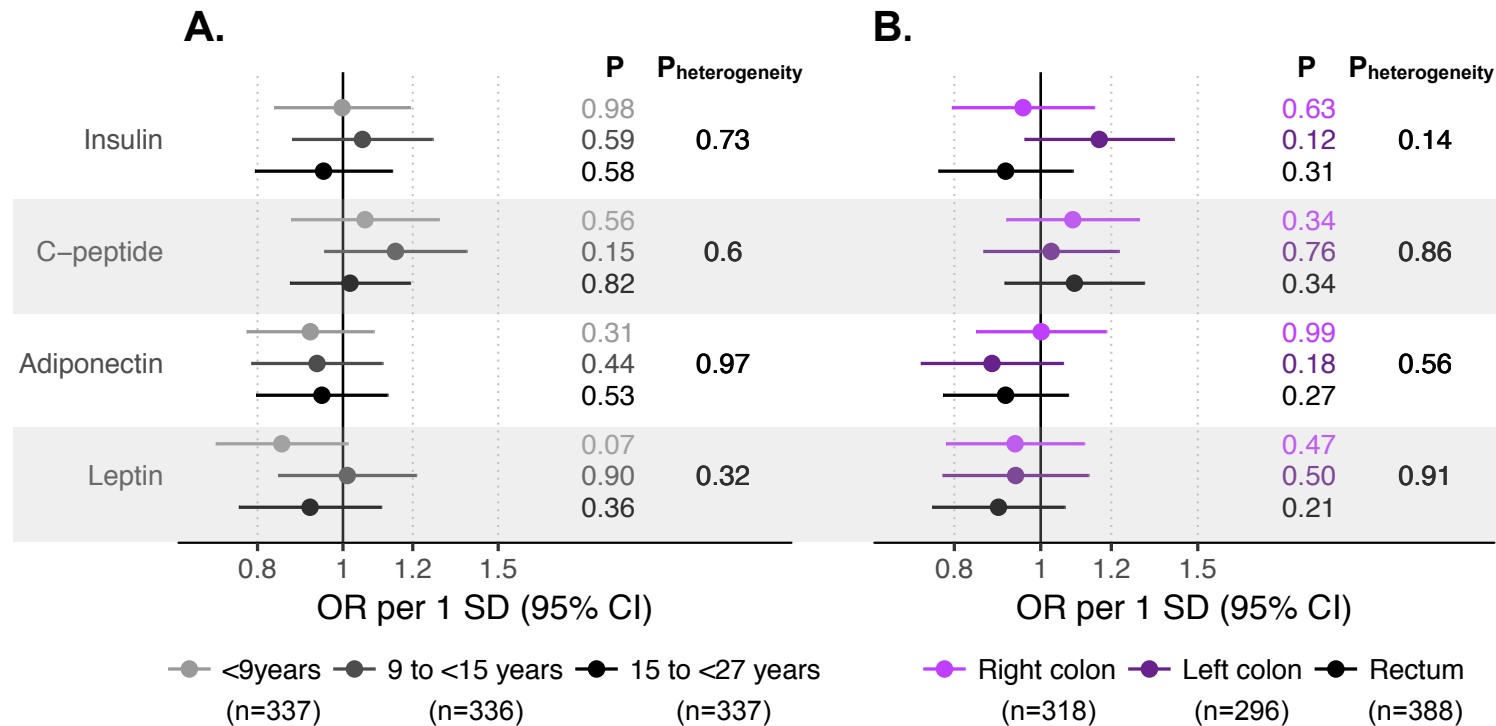

**Supplementary Figure 2. Odds ratios (ORs) of CRC by (A) follow-up time between sampling and diagnosis and (B) tumor site per 1 SD increase in metabolic biomarkers.** Estimated in 1010 cases and 1010 matched controls, adjusted for matching variables and smoking, occupational and recreational physical activity, alcohol intake, and BMI. Heterogeneity across tumor site was tested with a likelihood ratio test, comparing a model in which the risk association could vary across subtypes to a model where all associations were held constant. Numbers (n) within subtypes represent complete cases, data for the remaining cases were imputed.



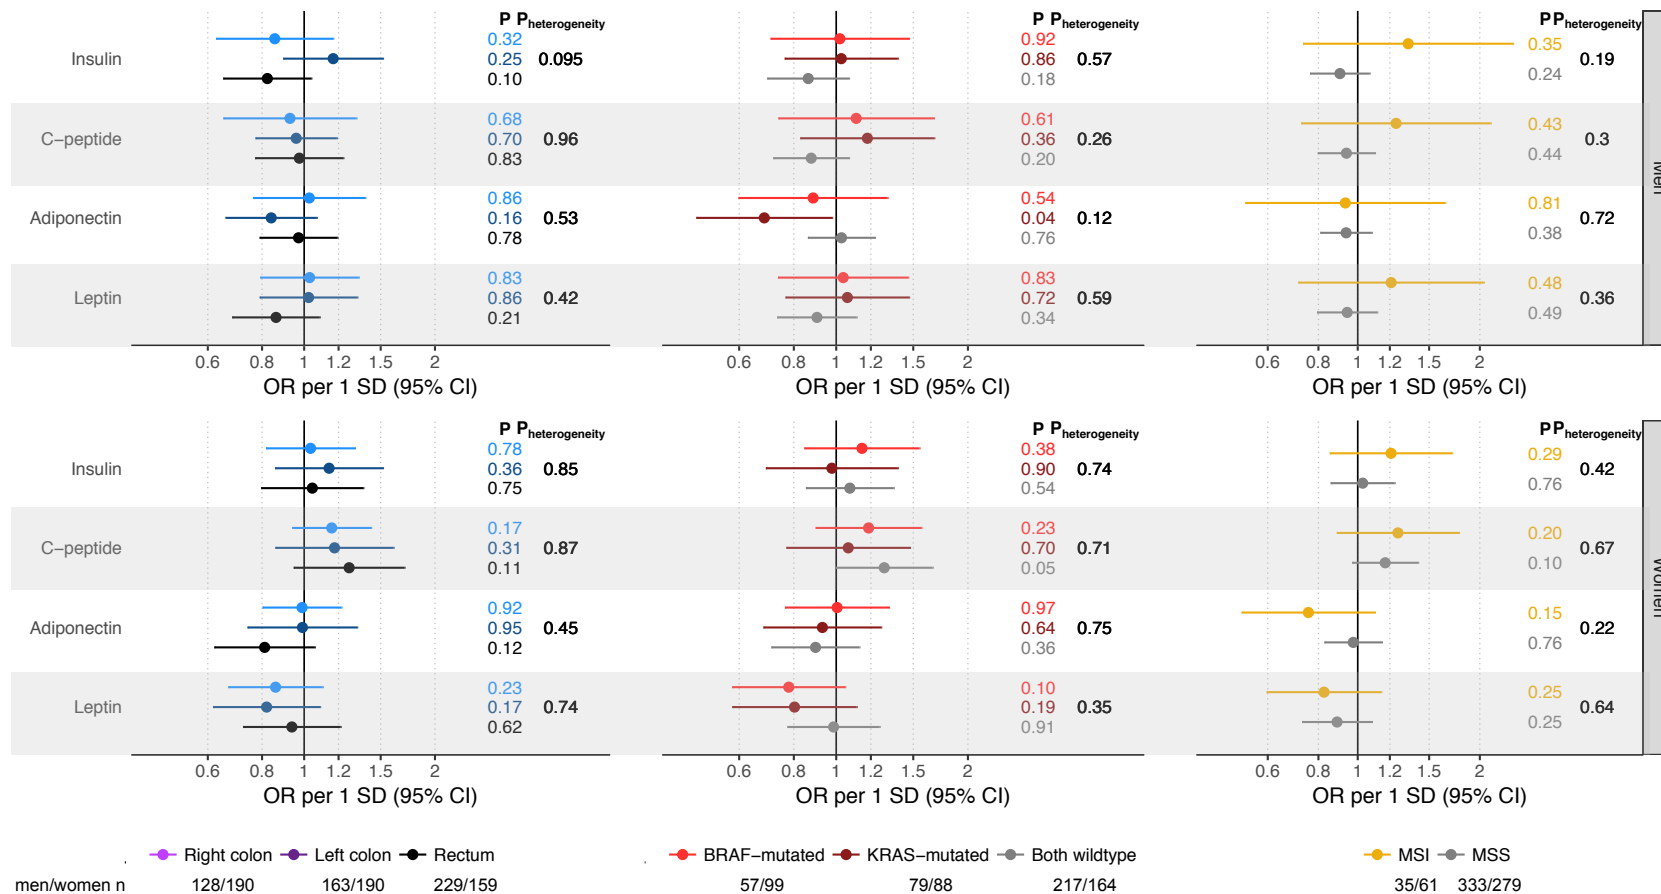

**Supplementary Figure 3. Sex-specific odds ratios (ORs) of CRC by tumor site, *KRAS* and *BRAF* mutation status, and MSI status per 1 SD increase in metabolic biomarkers.** Estimates were adjusted for matching variables and smoking, occupational and recreational physical activity, alcohol intake, and BMI. Heterogeneity across subtypes was tested with a likelihood ratio test, comparing a model in which the risk association could vary across subtypes to a model where all associations were held constant. Numbers (men/women) within subtypes represent complete cases, data for the remaining cases were imputed.
